# Supplementary material
Source: PubMed Central journal article supplement (PMC8617420)
Supplement: pnas.2116570118.sapp.pdf [file pnas.2116570118.sapp.pdf]

1 **The Small Molecule Zearactin Activates ZAR1-Mediated Immunity in Arabidopsis**

2 **Authors:** Derek Seto<sup>1¶</sup>, Madiha Khan<sup>1,3¶</sup>, D. Patrick Bastedo<sup>1</sup>, Alexandre Martel<sup>1</sup>, Trinh Vo<sup>1</sup>, David  
3 Guttman<sup>1,2</sup>, Rajagopal Subramaniam<sup>1,3\*</sup>, Darrell Desveaux<sup>1,2\*</sup>

4 <sup>1</sup> Department of Cell and Systems Biology, University of Toronto, Toronto, Ontario, Canada

5 <sup>2</sup> Centre for the Analysis of Genome Evolution & Function, University of Toronto, Toronto, Ontario,  
6 Canada

7 <sup>3</sup> Agriculture and Agri-Food Canada, Carleton University, Ottawa, Ontario, Canada

8 ¶ These authors contributed equally

9 \* Corresponding authors: rajagopal.subramaniam@agr.gc.ca, darrell.desveaux@utoronto.ca

10 **Supporting Information**

11

12

13

14

15

16

17

18

19

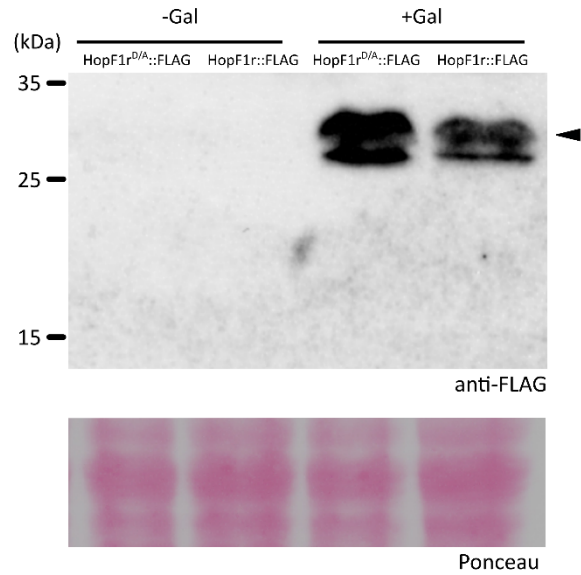

1  
2 **Supplementary Fig. 1 | Genomic expression of HopF1r::FLAG and HopF1r<sup>D/A</sup>::FLAG in yeast.** The yeast  
3 strain EGY48 containing genomic integrations of *hopF1r* or *hopF1r<sup>D/A</sup>* was grown on YNB supplemented  
4 with 2% glucose (first two lanes) or with 1 % raffinose and 2 % galactose (last two lanes) to induce  
5 expression of constructs. Expression of FLAG-tagged proteins was detected with anti-FLAG M2 antibody  
6 at a dilution of 1/15000 (Sigma). The black arrow indicates size of HopF1r::FLAG (~25 kDa).

1  
2  
3  
4  
5

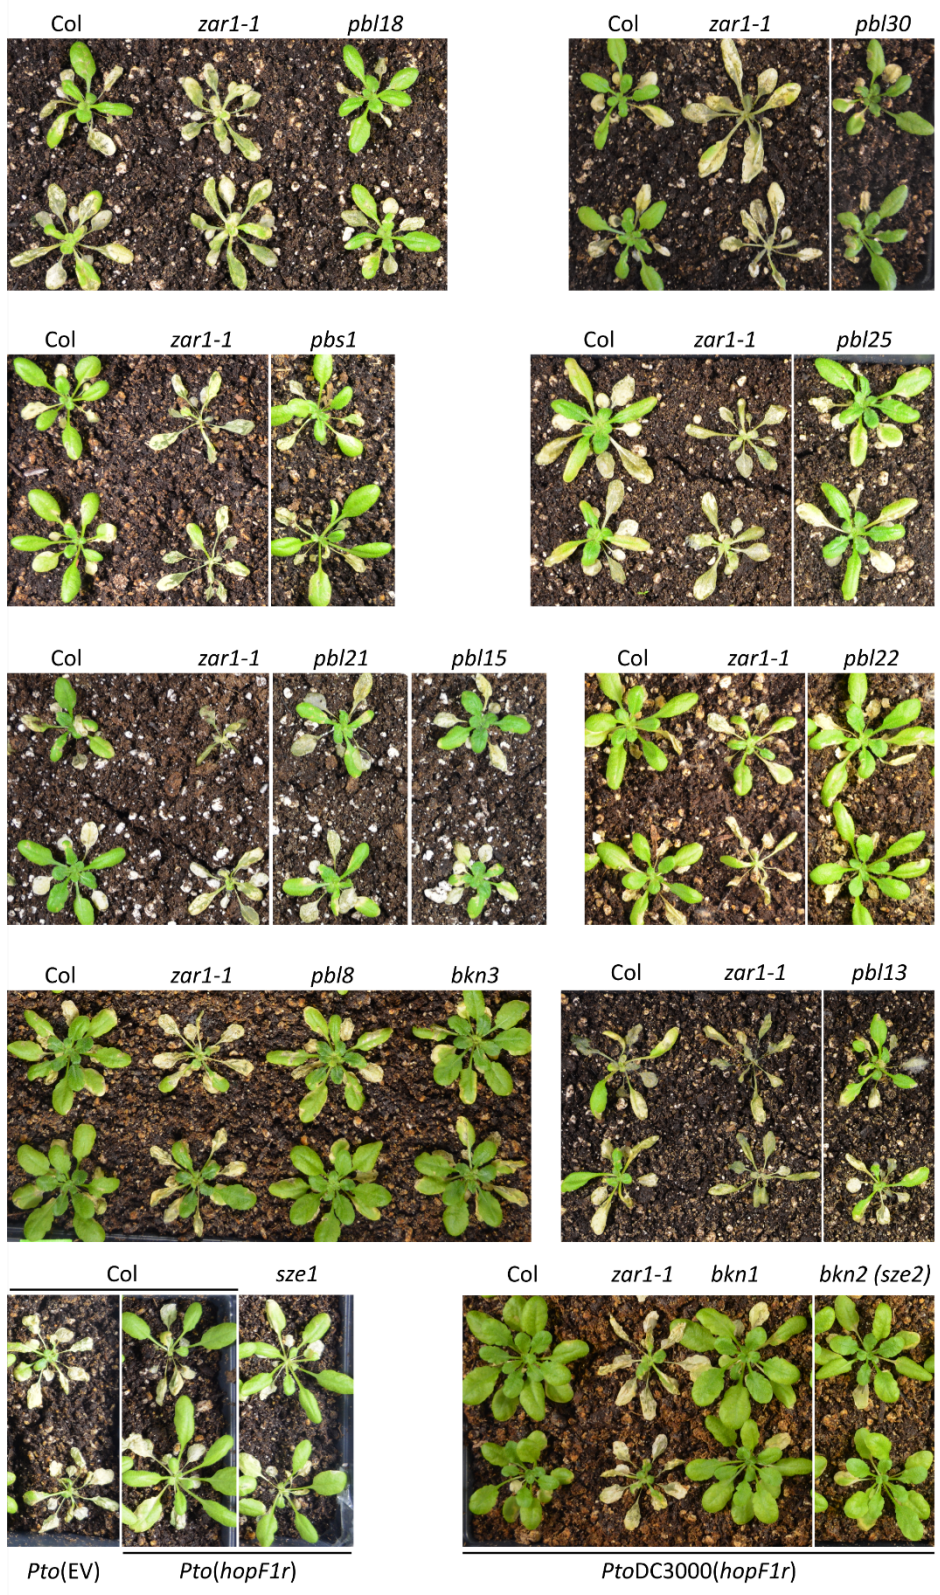

1 **Supplementary Fig. 2 | Multiple Arabidopsis *pbl* knockout lines remain resistant to**  
2 ***PtoDC3000(hopF1r)*.** Disease phenotypes of Col-0, *zar1-1*, or indicated *pbl* knockout Arabidopsis plants  
3 after spraying with *PtoDC3000(hopF1r)* or *PtoDC3000(EV)* at OD<sub>600</sub> = 1.0. Symptoms pictured are 14 days  
4 post-infection. T-DNA insertion lines are listed in Table S1 and were all genotyped for homozygosity.

5  
6  
7  
8  
9  
10  
11  
12  
13  
14  
15  
16  
17  
18  
19  
20  
21  
22  
23  
24  
25  
26  
27  
28  
29  
30



1  
2  
3  
4  
5  
6  
7  
8  
9  
10  
11  
12  
13  
14  
15  
16  
17  
18  
19  
20  
21  
22

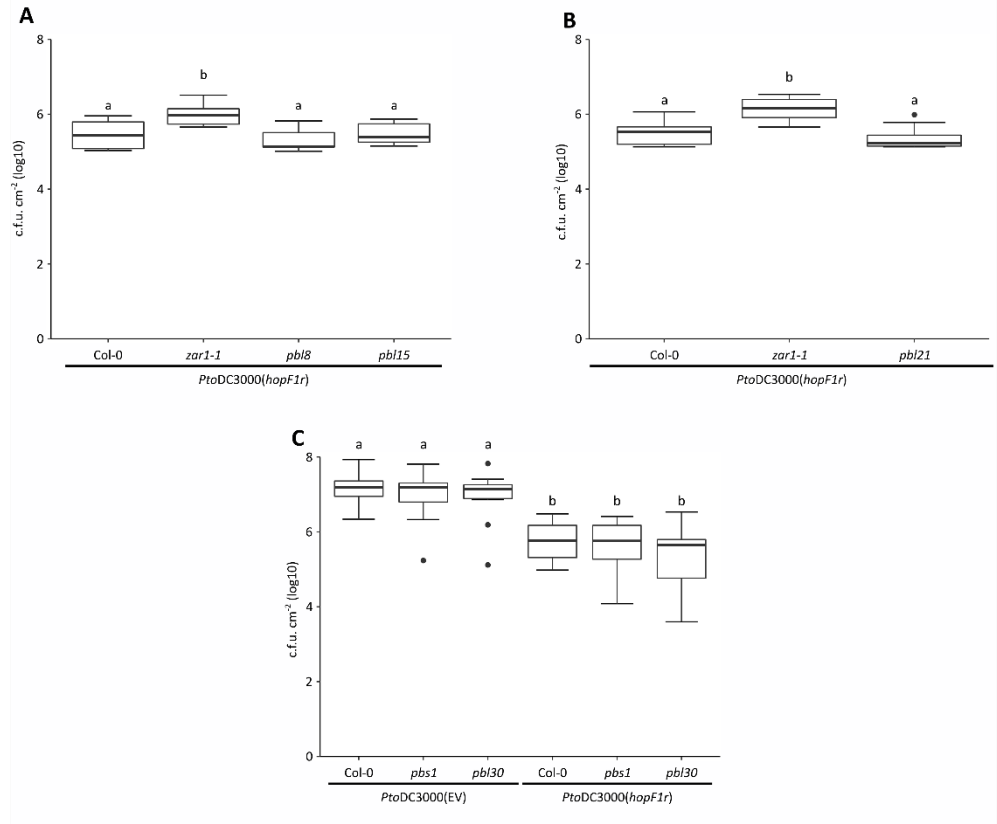

**Supplementary Fig. 3 | Multiple Arabidopsis *pbl* knockout lines remain resistant to *PtoDC3000(hopF1r)* as demonstrated by bacterial growth assays.** Bacterial growth on Arabidopsis Col-0, *zar1-1*, **(A)** *pbl8*, *pbl15*, **(B)** *pbl21*, **(C)** *pbs1*, or *pbl30* plants after spraying with *PtoDC3000(hopF1r)* or *PtoDC3000(EV)* as indicated at OD<sub>600</sub> = 1.0. Letters represent statistically significant differences (Tukey's HSD, P < 0.05). T-DNA insertion lines are listed in Table S1 and were all genotyped for homozygosity.

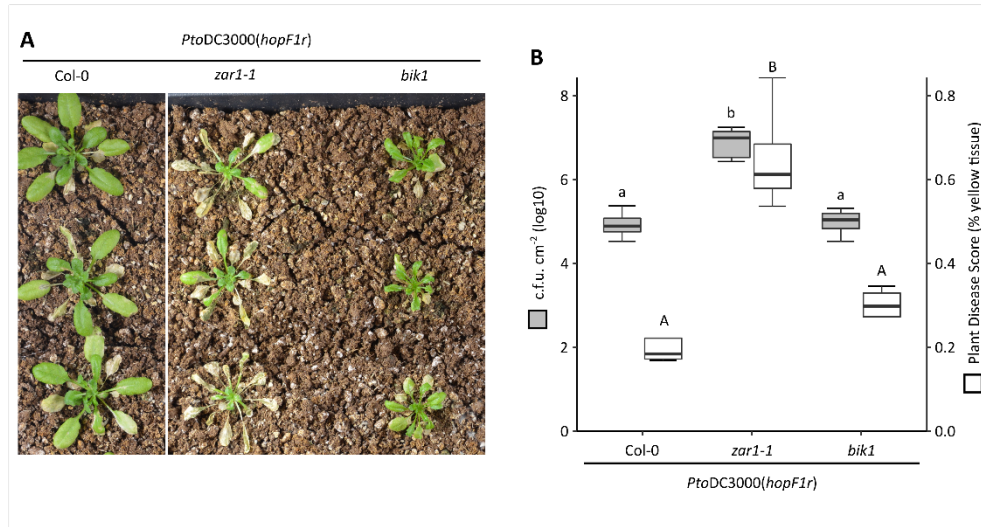

1 **Supplementary Fig. 4 | *BIK1* is not required for HopF1r-triggered immunity in Arabidopsis. (A)** Disease  
 2 phenotypes of Col-0, *zar1-1*, or *bik1* Arabidopsis plants after spraying with *PtoDC3000(hopF1r)* at OD<sub>600</sub> =  
 3 1.0. Symptoms pictured are 14 days post-infection. **(B)** Growth of *PtoDC3000(hopF1r)* (grey) or PIDIQ  
 4 disease quantification (white) on Col-0, *zar1-1*, and *bik1* plants. Bacterial counts were taken at 3 days  
 5 post-infection. Lowercase letters represent statistically significant differences (Tukey's HSD, P < 0.05).  
 6 Experiments were replicated three times with similar results. Capital letters represent statistically  
 7 significant differences for PIDIQ disease quantification (Tukey's HSD, P < 0.05). *bik1* line was genotyped  
 8 for homozygosity.  
 9

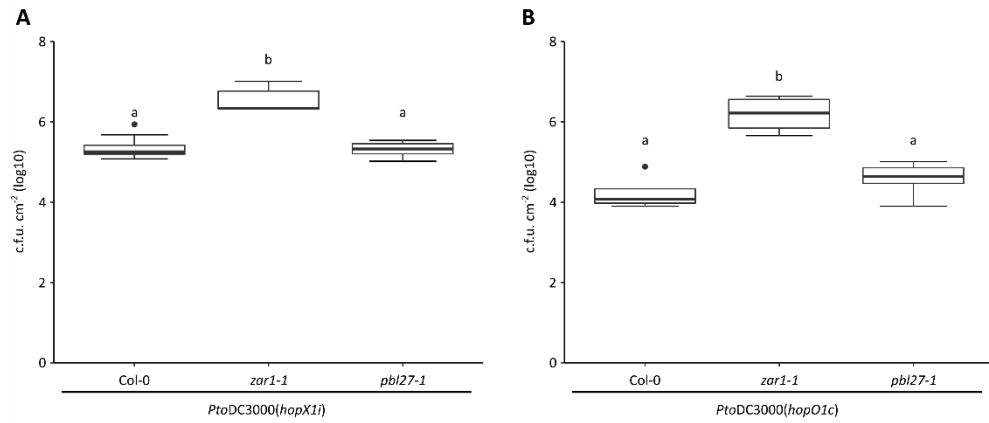

1  
2  
3  
4  
5  
6  
7  
8  
9  
10  
11  
12  
13  
14  
15

**Supplementary Fig. 5 | *PBL27* is not required for HopX1i- and HopO1c-triggered immunity in Arabidopsis.** Growth of **(A)** *PtoDC3000(hopX1i)* or **(B)** *PtoDC3000(hopO1c)* on Col-0, *zar1-1*, or *pbl27-1*, *pbl27-2* plants after spraying at OD<sub>600</sub> = 1.0. Bacterial counts were taken at 3 days post-infection. Letters represent statistically significant differences (Tukey's HSD, P < 0.05). Experiments were replicated three times with similar results.

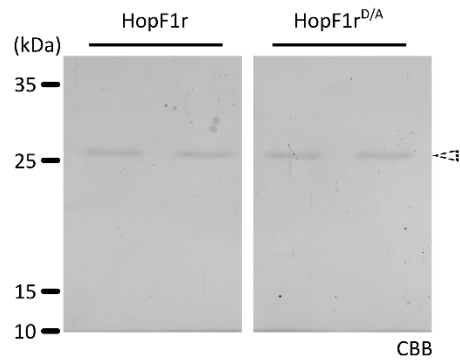

1 **Supplementary Fig. 6 | Purified HopF1r and HopF1r<sup>D/A</sup> used for ADP-ribosylation.** The same amount of  
2 purified His::HopF1r or His::HopF1r<sup>D/A</sup> used in the ADP-ribosylation assay (Fig. 1D) was run on SDS-PAGE  
3 and Coomassie stained (CBB) to indicate size and equal loading of enzyme. Dashed arrow indicates  
4 position of His::HopF1r (~25 kDa).

5

6

1  
2  
3  
4  
5  
6  
7  
8  
9  
10  
11  
12  
13  
14  
15  
16  
17  
18  
19  
20

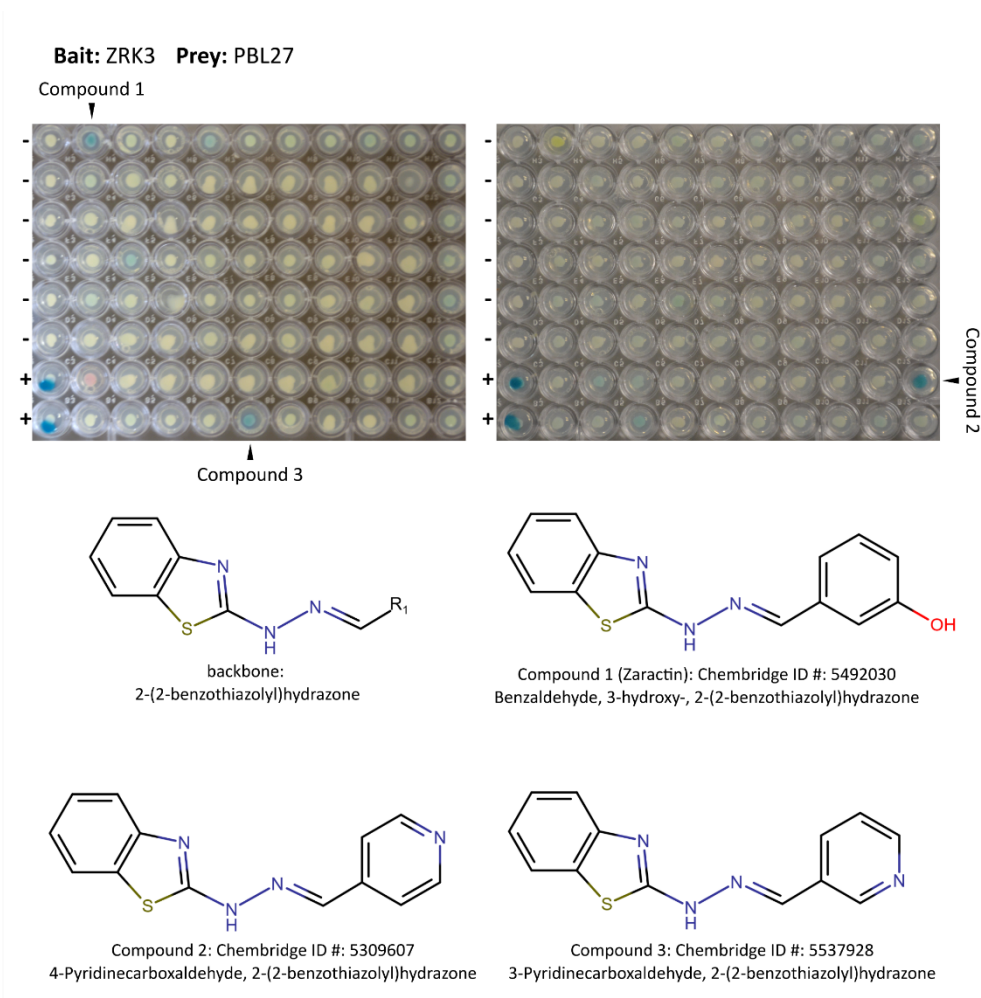

**Supplementary Fig. 7 | Chemical screen to induce the ZRK3-PBL27 interaction.** Y2H assay screening plates of induced interactions between ZRK3 and PBL27 against a subset of the Yeast-Active chemical library showing the three top hits of the screen. All chemicals were tested at a concentration of 30  $\mu$ M. The first column of each plate includes two positive control (+) wells [HopZ1a-induced ZED1-PBL15 interaction]<sup>6</sup>, and 6 negative control (-) wells (DMSO). Structures of chemicals identified as strongest inducers of ZRK3-PBL27 interactions from Y2H chemical screen and their common backbone are displayed below.



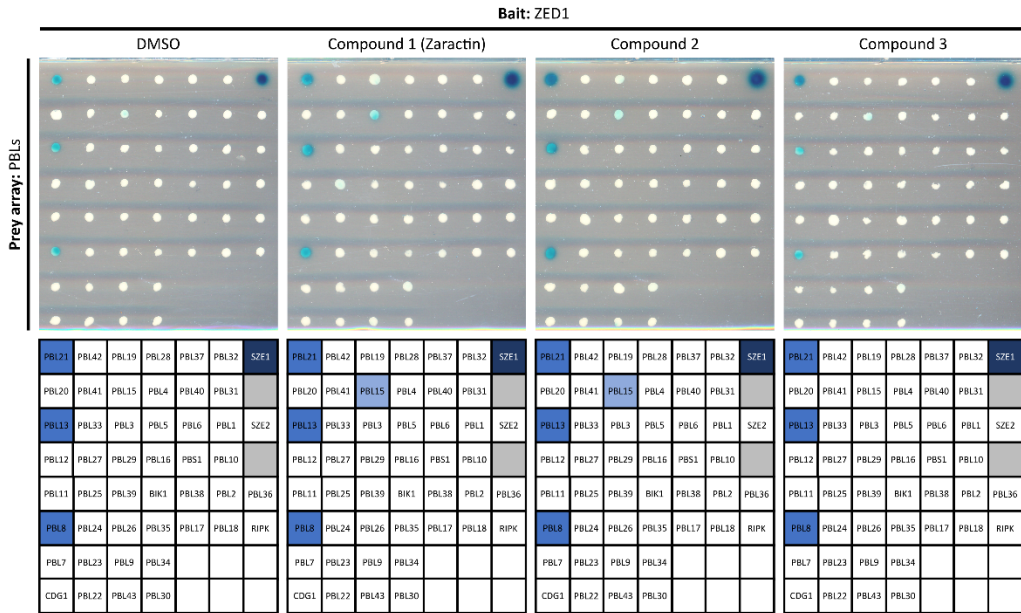

2 **Supplementary Fig. 8 | Zaractin and related chemicals do not induce a ZED1-PBL27 interaction.** Y2H  
 3 assay testing interactions between ZED1 and a PBL array against chemicals that were identified as the  
 4 strongest inducers of the ZRK3-PBL27 interaction (Fig. S7). Panels from left to right: DMSO, Compound 1  
 5 (Zaractin), Compound 2, Compound 3. All chemicals were tested at a concentration of 30  $\mu$ M.  
 6 Interaction layouts are depicted on right. Grey boxes are not relevant to this study.

7  
8  
9  
10  
11  
12  
13

**A**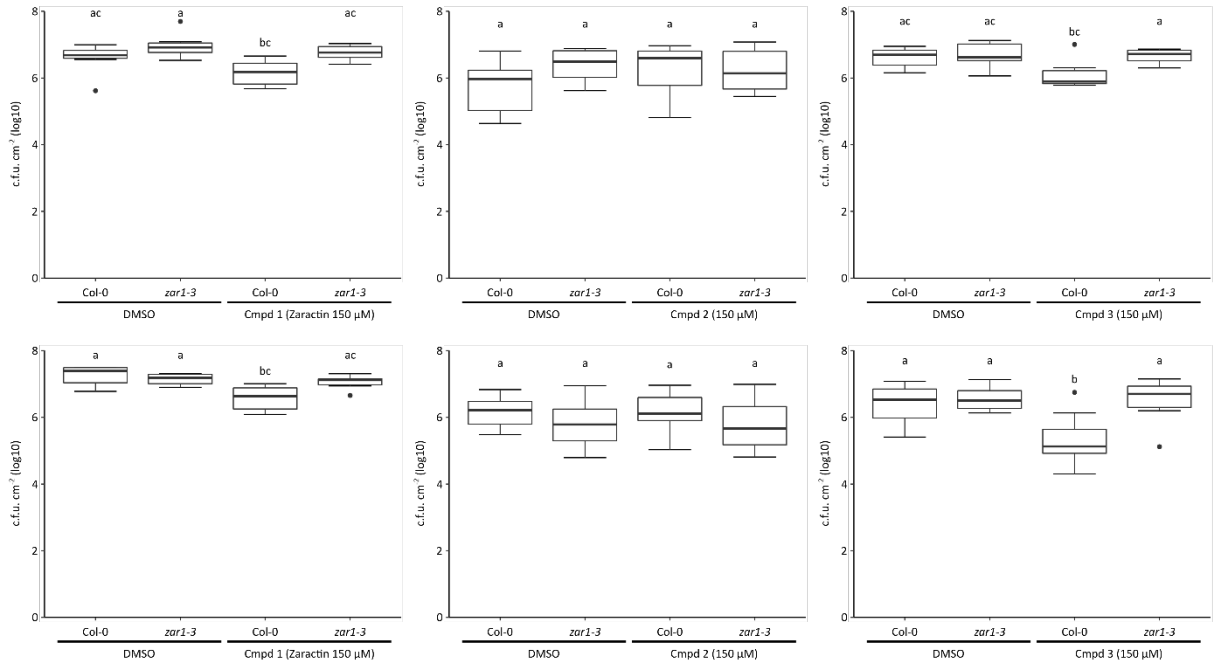**B**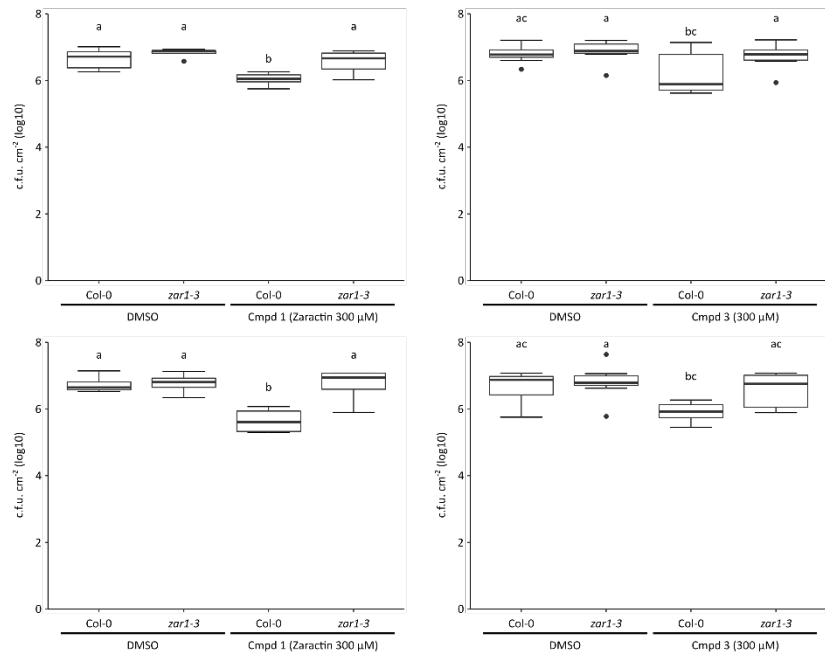

1 **Supplementary Fig. 9 | Immune induction dose-response for the three compounds identified in our**  
2 **chemical screen. (A)** Growth of *PtoDC3000* on Col-0 or *zar1-3* Arabidopsis plants treated with DMSO or  
3 150  $\mu$ M of indicated compound 2 days before infection. Duplicate experiments are shown for  
4 Compound 1 (Zaractin; left panels), Compound 2 (middle panels), and Compound 3 (right panels). **(B)**  
5 Growth of *PtoDC3000* on Col-0 or *zar1-3* plants treated with DMSO or 300  $\mu$ M of indicated compound 2  
6 days before infection. Duplicate experiments are shown for Compound 1 (Zaractin; left panels) and  
7 Compound 3 (right panels). Plants were sprayed with *PtoDC3000* at  $OD_{600} = 1.0$ . Letters represent  
8 significance groups (Tukey's HSD,  $P < 0.05$ ).

9

10

11

12

13

14

15

16

17

18

19

20

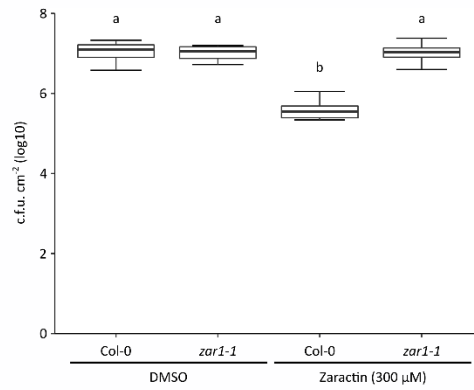

1

2 **Supplementary Fig. 10 | Zaractin triggers immunity in a ZAR1-dependent manner using an**  
 3 **independent T-DNA line.** Growth of *PtoDC3000* on Col-0 or *zar1-1* Arabidopsis plants treated with  
 4 DMSO or 300 μM Compound 1 (Zaractin) 2 days before infection. Plants were sprayed with *PtoDC3000*  
 5 at OD<sub>600</sub> = 1.0. Letters represent statistically significant differences (Tukey's HSD, P < 0.05).

6

7

8

9

10

11

1  
2  
3  
4  
5  
6  
7  
8  
9  
10  
11  
12  
13  
14  
15  
16  
17

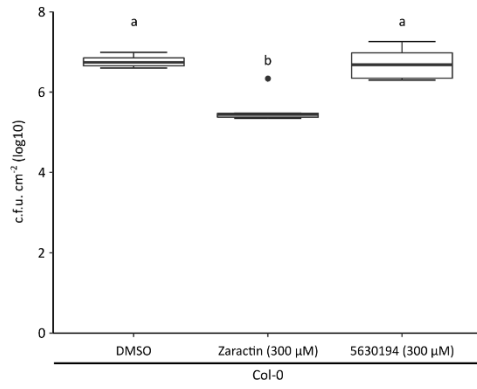

**Supplementary Fig. 11 | Modification of the Zaractin R group compromises its activity.** Growth of *PtoDC3000* on Arabidopsis Col-0 plants treated with DMSO, 300 μM Compound 1 (Zaractin), or 300 μM of a closely related compound (Chembridge ID: 5630194) 2 days before infection. Plants were sprayed with *PtoDC3000* at OD<sub>600</sub> = 1.0. Letters represent statistically significant differences (Tukey's HSD, P < 0.05).



1

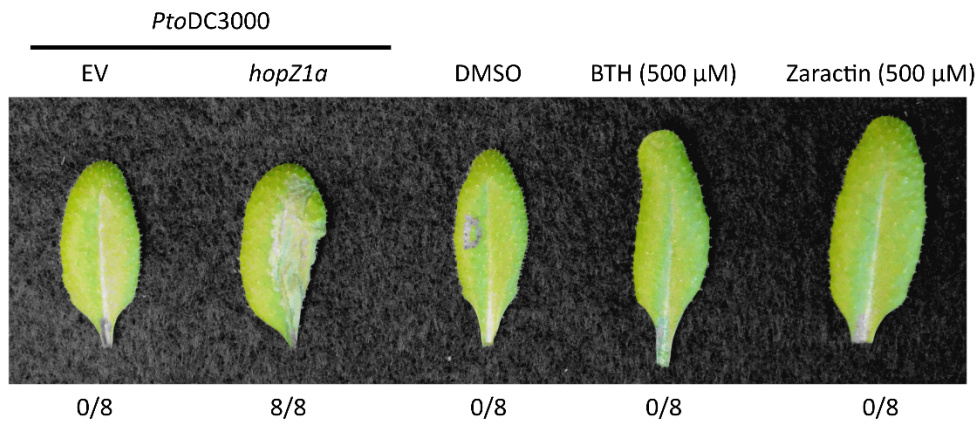

2

3 **Supplementary Fig. 12 | Zaractin does not trigger a hypersensitive response in Arabidopsis.**

4 *PtoDC3000* (EV), *PtoDC3000(hopZ1a)*, DMSO, BTH, or Zaractin were infiltrated into half leaves of  
5 Arabidopsis Col-0 plants. The images were taken 16 h post-infection (hours post infiltration). The  
6 proportion of leaves showing an HR is indicated below each construct.

7

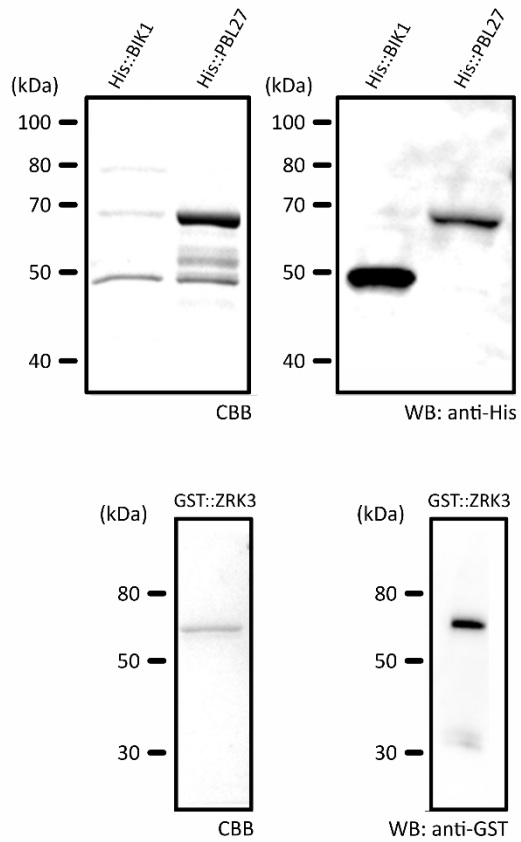

1

2 **Supplementary Fig. 13 | Purification of His::BIK , His::PBL27, and GST::ZRK3 tagged proteins.** Both

3 His::BIK1 and His::PBL27 proteins were purified by Capturem™ His-tagged purification kit, and

4 GST::ZRK3 proteins were purified with Glutathione Sepharose 4B matrix. The proteins were visualized by

5 Coomassie stain (CBB) and confirmed by Western blot analysis (WB) with His-HRP and GST-HRP

6 conjugated antibodies.

7

8

9

10

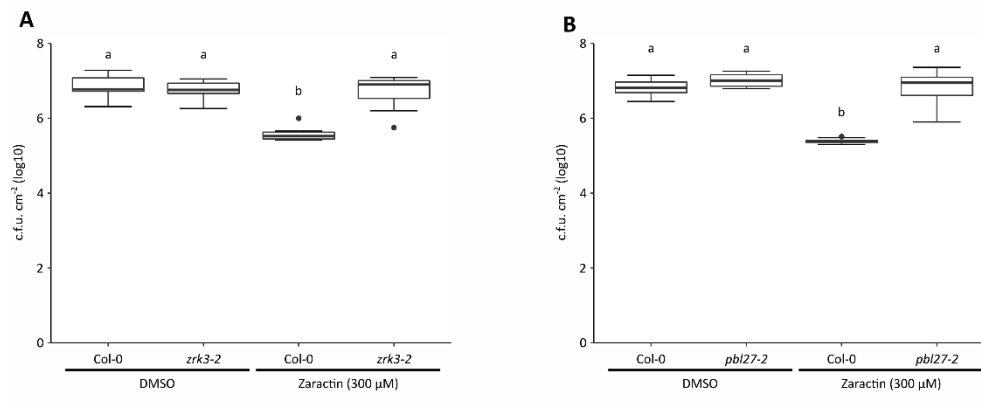

1

2 **Supplementary Fig. 14 | Zaractin triggers immunity in a *ZRK3*-, and *PBL27*-dependent manner using**  
 3 **independent T-DNA lines. Growth of *PtoDC3000* on Arabidopsis Col-0, (A) *zrk3-2* or (B) *pbl27-2* plants**  
 4 **treated with DMSO or 300 μM Compound 1 (Zaractin) 2 days before infection. Plants were sprayed with**  
 5 ***PtoDC3000* at OD<sub>600</sub> = 1.0. Letters represent statistically significant differences (Tukey's HSD, P < 0.05).**

6

7

8

9

10

11

12

13

14

15

16

17

18

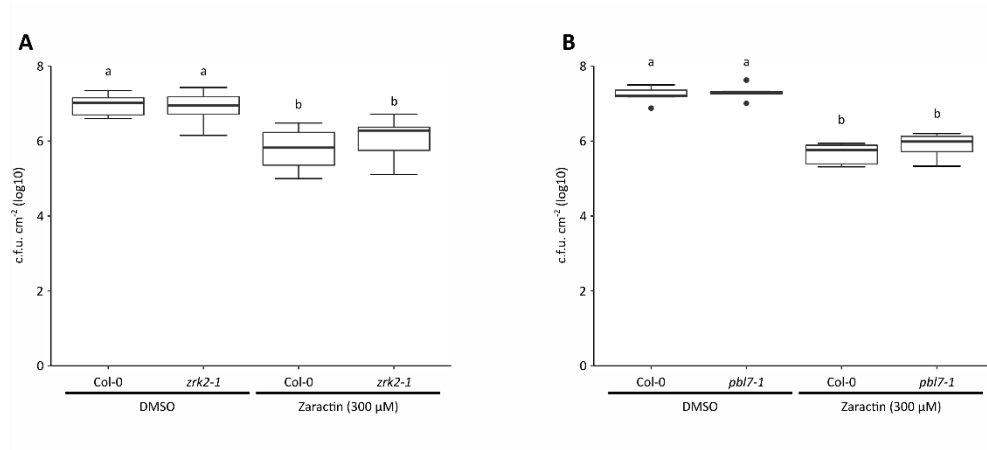

1

2 **Supplementary Fig. 15 | Zaractin insensitivity is not a general property of T-DNA insertion lines.**

3 Growth of *PtoDC3000* on Arabidopsis Col-0, **(A)** *zrk2-1*, or **(B)** *pbl7-1* plants treated with DMSO or 300

4 μM Compound 1 (Zaractin) 2 days before infection. Plants were sprayed with *PtoDC3000* at  $OD_{600} = 1.0$ .

5 Letters represent statistically significant differences (Tukey's HSD,  $P < 0.05$ ).

6

7

8

9

10

11

12

13

14

15

1 **Table S1:** List of ZRK3-PBL Y2H interactions.

| ZRK3 interaction type  | Gene locus | PBL/Gene name      | T-DNA line                                               |
|------------------------|------------|--------------------|----------------------------------------------------------|
| Not enhanced by HopF1r | At5g11360  | <i>BKN3</i>        | SALK_092036                                              |
|                        | At5g11400  | <i>BKN1</i>        | <i>bkn1-3</i> (Daphne Goring: CRISPR)                    |
|                        | At5g11410  | <i>SZE2 (BKN2)</i> | <i>bkn2-2</i> (Daphne Goring: CRISPR)                    |
| HopF1r-enhanced        | At1g20650  | <i>PBL21</i>       | SALK_031606                                              |
|                        | At1g61590  | <i>PBL15</i>       | SALK_055095                                              |
|                        | At1g69790  | <i>PBL18</i>       | SALK_202072                                              |
|                        | At1g76370  | <i>PBL22</i>       | SALK_045159                                              |
|                        | At2g39660  | <i>BIK1</i>        | SALK_005291 (Jacqueline Monaghan)                        |
|                        | At3g24790  | <i>PBL25</i>       | SALK_036509                                              |
|                        | At4g35600  | <i>PBL30</i>       | SALK_099176                                              |
|                        | At5g01020  | <i>PBL8</i>        | SALK_044339                                              |
|                        | At5g13160  | <i>PBS1</i>        | SALK_023996                                              |
|                        | At5g18610  | <i>PBL27</i>       | CS408439 ( <i>pbl27-1</i> ); CS400031 ( <i>pbl27-2</i> ) |
|                        | At5g25440  | <i>SZE1</i>        | SALK_083971 ( <i>sze1-3</i> )                            |
|                        | At5g35580  | <i>PBL13</i>       | SALK_203557                                              |

2

3

4

5

6



1 **Table S2:** List of chemicals used for Y2H experiments

2

3

4

5

6

7

8

9

10

11

12

13

14

15

| Chemical Structure | Name                                                                                         | Source                             |
|--------------------|----------------------------------------------------------------------------------------------|------------------------------------|
|                    | Acibenzolar-S-methyl<br>(benzothiadiazole/BTH<br>derivative)                                 | MilliporeSigma<br>Product #: 32820 |
|                    | Compound 1 (Zaractin):<br>Benzaldehyde, 3-hydroxy-,<br>2-(2-benzothiazolyl)hydrazone         | Chembridge ID #: 5492030           |
|                    | Compound 2:<br>4-Pyridinecarboxaldehyde,<br>2-(2-benzothiazolyl)hydrazone                    | Chembridge ID #: 5309607           |
|                    | Compound 3:<br>3-Pyridinecarboxaldehyde,<br>2-(2-benzothiazolyl)hydrazone                    | Chembridge ID #: 5537928           |
|                    | 1,3-benzothiazol-2-amine                                                                     | Chembridge ID #: 5108799           |
|                    | acetone 1,3-benzothiazol-<br>2-ylhydrazone                                                   | Chembridge ID #: 5549542           |
|                    | 4-(dimethylamino)<br>benzaldehyde 1,3-<br>benzothiazol-2-ylhydrazone                         | Chembridge ID #: 5483044           |
|                    | 4-fluorobenzaldehyde<br>1,3-benzothiazol-2-ylhydrazone                                       | Chembridge ID #: 5630194           |
|                    | 1-methyl-2-[(2E)-2-<br>[(pyridin-4-yl)methylidene]<br>hydrazin-1-yl]-1H-1,3-<br>benzodiazole | Molport-002-929-064                |

16

17

18

19

1 **Table S3:** Binding of Zaractin to PBL27 by thermal shift assay

|                  | <b>PBL27</b> | <b>BIK1</b> |
|------------------|--------------|-------------|
| Control          | 49.3 ± 0.42  | 45.1 ± 0.87 |
| Zaractin (30 nM) | 47.6 ± 0.59* | 45.3 ± 0.81 |
| BTH (30 nM)      | 48.3 ± 0.3   | 45.9 ± 1.8  |

2

3 Values represent mean melting temperature (°C) with standard error. \* Represents significant difference  
4 from the corresponding control treatment (P < 0.05). Data is representative of four independent  
5 biological samples with four technical replicates in each experiment.

6

7

8

9

10

11

12
